# Supplementary material for: Unlocking the potential of ancient hexaploid Indian dwarf wheat, Tritium sphaerococcum for grain quality improvement
Source: PeerJ. 2023 Jul 27;11:e15334. doi: 10.7717/peerj.15334 (PMC10387235; doi:10.7717/peerj.15334)
Supplement: Supplemental Information 1 [file peerj-11-15334-s001.xlsx]

## Sheet: Sheet1
Accessions	HW(kg/hl)	Sed (ml)	HI	Pro (%)	Alb(mg/g)	Glo(mg/g)	Gli (mg/g)	Glu (mg/g)	Gluten(mg/g)	Lys (% )	Fe(ppm)	Zn (ppm)	TGW(g)	PER(unit/ml)	CAT(unit/ml)	GR(unit/ml)	SOD(unit/ml)																				Accessions	Protein (%)	Gluten(mg/g)	Lysine (% )
EC541164	85	27.5	94.7441	15.9332	27.3054	11.8164	34.491	28.982	63.4731	0.06	118.5	17.05	27.2215	0.595238	0.099656	0.364139	0.324575																				EC576654	15.341	63.12	0.08
IC534882	77.5	35	78.3194	16.3656	23.4224	10.8408	33.9466	28.5658	62.5124	0.23	113.8	22.25	30.8317	0.435464	0.0321292	0.261265	0.181467																				EC541164	15.9332	63.4731	0.06
EC187167	81	33	85.8436	17.6244	23.44	12	26.72	33.04	59.76	0.09	96.05	15.85	34.4	0.366541	0.0967317	0.212645	0.213951																				EC187182	18.4127	63.604	0.07
EC313761	81.5	27	95.1643	17.428	26.6932	15.5378	44.9402	30.1195	75.0598	0.23	137.45	23.35	28.5269	0.35401	0.0706613	0.864994	0.299502																				EC613057	18.72	60.5384	0.06
EC576654	82.5	29	83.2482	15.341	24.4	13.52	35.52	27.6	63.12	0.08	91.35	16.45	29.4011	0.344612	0.0491399	0.676537	0.239842																				EC313761	17.428	75.0598	0.23
EC182956	79.5	28	96.3935	18.2776	19.4206	13.2667	29.8102	32.2877	62.0979	0.15	104.35	11.45	30.1022	0.341479	0.080581	1.8484	0.970493																				IC397363	15.7554	68.794	0.22
EC187181	83	25.5	93.9973	17.7709	24.2063	13.4127	29.5238	31.9841	61.5079	0.06	97.25	20.9	31.4615	0.335213	0.0861621	0.273796	0.36218																				EC187172	17.161	64.2871	0.04
EC187183	82.5	30	90.5595	18.5444	23.5857	11.2351	32.6693	30.9163	63.5857	0.1	113.8	21.35	33.8404	0.335213	0.0861621	0.273796	0.36218																				IC534021	18.4976	57.1565	0.21
EC187172	83.5	33	90.385	17.161	24.0877	15.7926	36.3709	27.9163	64.2871	0.04	84.25	17.45	35.8735	0.325815	0.100707	0.581301	0.262824																				IC384530	18.8978	72.6831	0.13
IC534021	82.5	35	92.2953	18.4976	25.1629	15.6222	29.8894	27.2671	57.1565	0.21	115	16.85	31.5725	0.322682	0.0253631	0.624906	0.27073																				EC187181	17.7709	61.5079	0.06
EC182947	71.5	30	92.3018	18.0399	23.3466	14.5817	32.1912	31.5538	63.745	0.05	99.6	19.9	31.828	0.288221	0.0217125	1.34555	0.486775																				IC534522	17.0875	65.3147	0.24
ADP19/101	83	25	97.7335	18.25	22.24	14.64	35.28	34.64	69.92	0.22	113.8	15.95	28.8345	0.281955	0.134136	1.01976	0.303501																				EC187176	17.08	65.0199	0.28
IC212160	84.5	26	83.1394	16.6035	25.9245	13.2803	37.9324	31.9682	69.9006	0.23	110.25	22.35	32.4662	0.244361	0.118846	0.814625	0.191112																				IC533826	18.8185	72.0165	0.2
IC397363	81	28	89.1727	15.7554	24.3575	11.2297	38.4342	30.3598	68.794	0.22	133.9	14.6	32.7636	0.238095	0.0840596	0.218789	0.212353																				IC420038	16.6394	67.3684	0.13
EC187182	70.5	30	51.0773	18.4127	27.802	14.8911	39.1287	24.4752	63.604	0.07	122.05	24.8	38.5455	0.216165	0.0944572	1.45056	0.306254																				EC182958	18.05	71.4486	0.12
IC53387	80.5	28	88.7111	15.6291	28.2512	14.3569	30.2293	30.1815	60.4108	0.18	117.35	19.5	36.2339	0.206767	0.217775	0.541327	0.340165																				IC534882	16.3656	62.5124	0.23
EC613055	81.5	27.5	83.6841	16.1726	23.5622	10.9851	33.4328	26.2687	59.7015	0.09	89	20.2	29.6087	0.200501	0.141495	0.182202	0.235142																				EC182947	18.0399	63.745	0.05
EC180067	78.5	29	71.2974	17.5765	19.68	12.88	29.6	36	65.6	0.1	119.7	19.1	34.2155	0.175439	0.0731078	0.766758	0.488145																				EC182945	18.53	66.72	0.26
EC180066	86	27.5	85.3412	18.0103	20.24	12.72	31.12	27.6	58.72	0.18	74.75	14.4	36.3041	0.169173	0.0680619	1.92795	0.344712																				EC613055	16.1726	59.7015	0.09
EC180062	83.5	33	86.7808	17.6768	24.48	16.08	35.92	32.8	68.72	0.11	124.45	21.15	45.55	0.159774	0.0218846	0.0984905	0.502112																				EC180062	17.6768	68.72	0.11
IC533826	80	30	98.1406	18.8185	23.7253	11.8944	38.6964	33.3201	72.0165	0.2	128	12.85	27.462	0.14411	0.11357	0.703725	0.222019																				EC187183	18.5444	63.5857	0.1
EC182959	80.5	29	104.918	15.4573	22.0359	12.7745	26.3473	28.982	55.3293	0.16	105.5	16.05	26.0523	0.128446	0.0703364	0.584179	0.17934																				EC187167	17.6244	59.76	0.09
EC10494	81	28	57.6552	19.24	29.5704	13.9061	32.4476	37.2428	69.6903	0.14	133.9	21.55	36.625	0.125313	0.0720757	1.51534	0.135021																				EC180066	18.0103	58.72	0.18
IC384530	82.5	32	81.0681	18.8978	20.1345	14.1658	41.7811	30.9021	72.6831	0.13	158.75	16.25	31.1073	0.125313	0.154243	0.0105654	0.62922																				EC10494	19.35	69.6903	0.14
IC534522	85	31.5	89.8075	17.0875	40.3187	10.757	33.1474	32.1673	65.3147	0.24	113.8	19.3	39.3165	0.119048	0.0239679	0.703105	0.150875																				IC53387	15.6291	60.4108	0.18
EC180041	82	31	85.1512	18.58	19.98	12.0679	30.8492	30.6094	61.4585	0.1	125.6	23.5	32.8067	0.109649	0.202408	0.256383	0.232777																				EC182959	15.4573	55.3293	0.16
EC10492	77	35.5	54.1242	17.9732	30	13.52	37.52	35.68	73.2	0.29	113.8	25.7	30.3113	0.103383	0.0863341	1.03967	0.212641																				IC212160	16.6035	69.9006	0.23
EC180061	82.5	32	86.295	18.1762	19.1426	13.8784	32.9412	33.1805	66.1216	0.14	86.6	19.5	33.3537	0.103383	0.289622	0.220416	0.27539																				EC10492	17.9732	73.2	0.29
EC182945	83	24	51.4334	18.53	17.6	16.56	35.2	31.52	66.72	0.26	118.5	20.7	36.224	0.093985	0.605657	0.104756	0.211914																				EC180061	18.1762	66.1216	0.14
IC420038	82	33	89.2263	16.6394	23.1182	12.0755	33.8431	33.5253	67.3684	0.13	112.6	20.7	30.9561	0.0845865	0.0727638	0.94658	0.276555																				EC180041	18.58	61.4585	0.1
EC613057	84	31	83.5105	19.35	23.8485	11.9641	34.3769	26.1615	60.5384	0.06	113.8	17.35	28.1985	0.0814536	0.341858	0.551854	0.177432																				EC180067	17.5765	65.6	0.1
EC182958	83.5	36	40.4948	19.05	19.98	12.7073	31.8881	39.5604	71.4486	0.12	123.25	23.8	30.7019	0.075188	0.0527905	0.24911	0.213429																				EC180063	18.9964	60.32	0.14
EC180063	78	38	89.9692	18.9964	22.16	15.92	34.72	25.6	60.32	0.14	135.1	15	35.0933	0.0556642	0.0917049	2.25866	0.279995																				ADP19/101	18.25	69.92	0.22
EC187176	82.5	35	50.7343	17.08	19.761	12.988	33.9442	31.0757	65.0199	0.28	128	18.8	39.4135	0.0532581	0.048987	0.34046	0.227131																				EC182956	18.2776	62.0979	0.15
